# Supplementary material for: The wild-type flagellar filament of the Firmicute Kurthia at 2.8 Å resolution in vivo
Source: PubMed Central journal article supplement (PMC6802091; doi:10.1038/s41598-019-51440-1), 2019-10-18
Supplement: 41598_2019_51440_MOESM1_ESM.pdf [file 41598_2019_51440_MOESM1_ESM.pdf]

# The wild-type flagellar filament of the Firmicute *Kurthia* at 2.8 Å resolution *in vivo*

Thorsten B Blum<sup>1,2,\*</sup>, Sevasti Filippidou<sup>3</sup>, Mathilda Fatton<sup>3</sup>, Pilar Junier<sup>3</sup>, Jan Pieter Abrahams<sup>1,2,4</sup>

## **Affiliations:**

<sup>1</sup>Biology and Chemistry, Laboratory of Nanoscale Biology, Paul Scherrer Institute (PSI), CH-5232 Villigen, Switzerland.

<sup>2</sup>Center for Cellular Imaging and NanoAnalytics (C-CINA), Biozentrum, University of Basel, CH-4058 Basel, Switzerland.

<sup>3</sup>Laboratory of Microbiology, Institute of Biology, University of Neuchâtel, CH-2000 Neuchâtel, Switzerland.

<sup>4</sup>Institute of Biology, Leiden University, Sylviusweg 72, 2333 CC Leiden, The Netherlands.

\*Correspondence to Thorsten B Blum, [thorsten.blum@psi.ch](mailto:thorsten.blum@psi.ch)

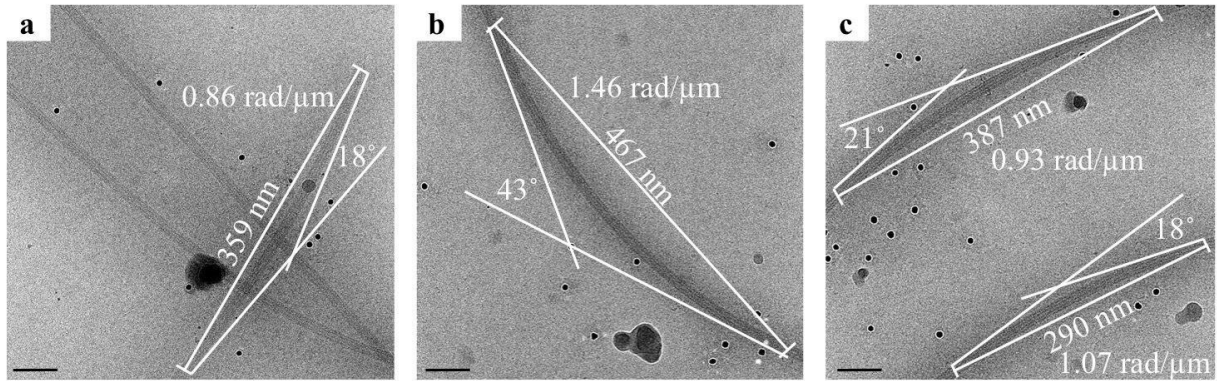

Supplementary Figure 1. The majority of the picked flagella are bent and had a curvature between  $0.8$  and  $1.5 \text{ rad}/\mu\text{m}$ . Scale bars:  $50 \text{ nm}$ .

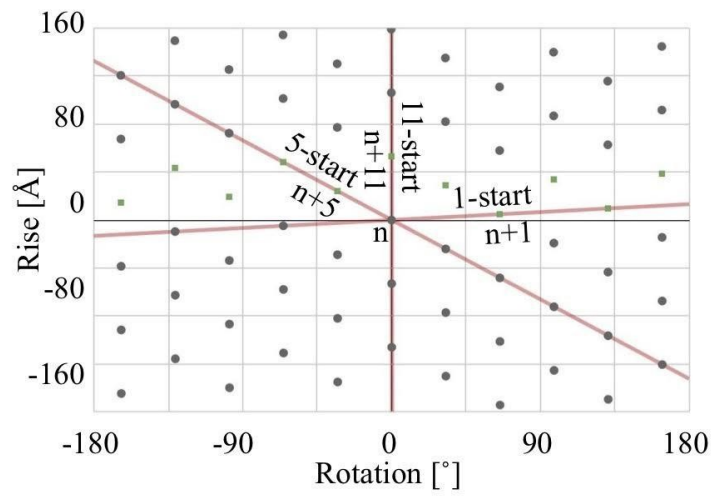

Supplementary Figure 2. Helical net of the flagellar filament. Each point represents one flagellin. One asymmetrical unit containing 11 flagellins is indicated in green. The 11-start helix is tilted by  $\sim 0.06^\circ$  to the left.

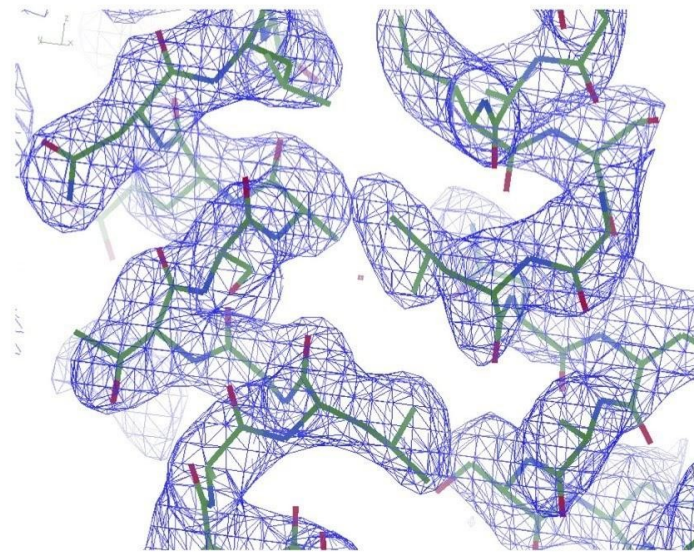

Supplementary Figure 3. Cryo-EM density map with part of the refined model.

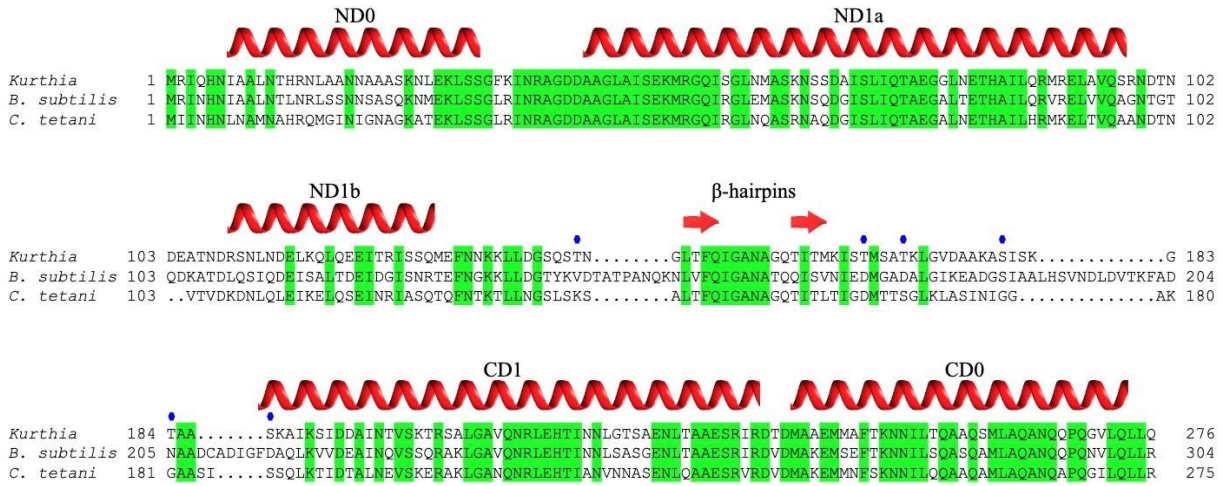

Supplementary Figure 4. Amino acid sequence alignment of the gram-positive bacteria *Kurthia* sp. 11kri321, *Bacillus subtilis* and *Clostridium tetani*. The six O-glycosylation sites of *Kurthia* are marked by blue hexagons.

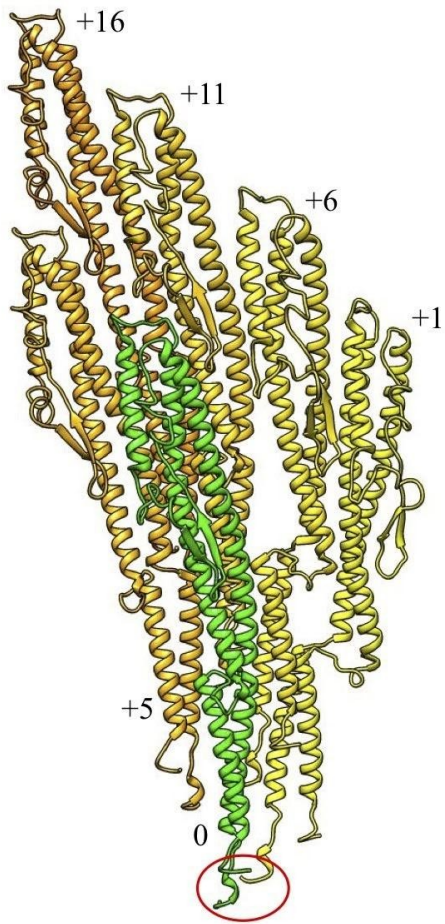

Interfacial subunit-subunit areas

|          |                    |
|----------|--------------------|
| 11-start | 1947Å <sup>2</sup> |
| 5-start  | 1809Å <sup>2</sup> |
| 6-start  | 569Å <sup>2</sup>  |
| 16-start | 293Å <sup>2</sup>  |
| 1-start  | 9Å <sup>2</sup>    |

Supplementary Figure 5. One flagellin subunit (green) with its 5 interacting neighbours (yellow) in the + direction shows a new interaction with the 1-start subunit (red circle). This new interaction is tentative because the C-terminus is flexible and therefore the electron density map is not well resolved.

Supplementary Video 1. Time lapse movie showing the active movement of *Kurthia* sp. 11kri321 cells in a growth chamber in liquid medium.
